# Supplementary material for: Comparison of Multiple Radiomics Models for Identifying Histological Grade of Pancreatic Ductal Adenocarcinoma Preoperatively Based on Multiphasic Contrast-Enhanced Computed Tomography: A Two-Center Study in Southwest China
Source: MDPI journal article supplement (doi:10.3390/diagnostics12081915), 2022-08-08
Supplement: s1 [file s1]

## ***Supplementary Materials***

### **Comparison of Multiple Radiomics Models for Identifying Histological Grade of Pancreatic Ductal Adenocarcinoma Preoperatively Based On Multiphasic Contrast-Enhanced Computed Tomography: A Two-Center Study in Southeast China**

The definitions of the clinical features are listed as follows:

- (1) clinical characteristics were recorded from electronic medical record  
gender, age, abdominal pain, backache, history of pancreatitis, jaundice, operation method
- (2) pathological characteristics were recorded from pathological report  
lymph node metastasis, duodenal invasion, surgical margin status, perineural invasion
- (3) imaging characteristics
  1. CT-reported tumour size(mm): the maximum tumour diameter in cross section
  2. tumour location: head and neck, body and tail
  3. tumour density (hypodensity, isodensity, hyperdensity): Referring relevant literature [1], we defined tumor density as the difference between the attenuation of tumor and normal pancreatic phase in arterial and venous phase. If normal pancreatic phase density minus tumor density,  $\Delta > 20$ , it represent hypodensity; if  $0 < \Delta < 20$ , it represent isodensity; if  $\Delta < 0$ , it represent hyperdensity. Tumor-pancreas contrast was calculated for each patient by drawing ROIs for both tumor and normal pancreas. Care was taken to exclude macroscopic enhanced blood vessels and pancreatic duct from the ROI.
  4. clinical T stage was assessed using CT-reported tumour size according to the AJCC TNM Staging System Manual, 8th Edition [3].
  5. distant metastasis: there were visible organ or tissue metastasis
  6. focal parenchymal atrophy: FPA is defined as narrowing of the focal parenchyma in comparison to both the head- and tail-side parenchyma, showing a cave-in, slim, or slit-like appearance[2].
  7. pancreatic duct dilatation: we define pancreatic duct dilatation as  $>3$  mm
  8. common bile duct dilatation: we define common bile duct dilatation as  $>10$  mm
- (4) laboratory characteristics:
  1. carcino-embryonic antigen (CEA) level: abnormal CEA as  $> 5$  ng/ml
  2. carbohydrate antigen 19-9 (CA19-9) level : abnormal CA199  $> 37$  U/ml
  3. total bilirubin (TBIL) level: abnormal TBIL level as  $> 20.5 \mu\text{mol/L}$

#### **Reference:**

- [1] Prokesch, R. W., Chow, L. C., Beaulieu, C. F., Bammer, R., & Jeffrey, R. B., Jr (2002). Isoattenuating pancreatic adenocarcinoma at multi-detector row CT: secondary signs. *Radiology*, 224(3), 764–768. <https://doi.org/10.1148/radiol.2243011284>
- [2] Nakahodo J., Kikuyama M., Nojiri S., Chiba K., Yoshimoto K., Kamisawa T., Horiguchi S.I., Honda G. Focal Parenchymal Atrophy of Pancreas: An Important Sign of Underlying

High-Grade Pancreatic Intraepithelial Neoplasia Without Invasive Carcinoma, i.e., Carcinoma in Situ. *Pancreatology*. 2020;20:1689–1697. doi: 10.1016/j.pan.2020.09.020.

[3] Chun Y, Pawlik T, Vauthey J. (2018) 8th Edition of the AJCC Cancer Staging Manual: Pancreas and Hepatobiliary Cancers. *Annals of surgical oncology*, 25(4),845–847. doi:10.1245/s10434-017-6025-x

Table S1 Multicollinearity check

**Coefficients<sup>a</sup>**

| Model |                            | Collinearity Statistics |       |
|-------|----------------------------|-------------------------|-------|
|       |                            | Tolerance               | VIF   |
| 1     | (Constant)                 |                         |       |
|       | CT-reported tumor size     | 0.215                   | 4.655 |
|       | CT-reported T stage        | 0.229                   | 4.372 |
|       | age                        | 0.879                   | 1.138 |
|       | gender                     | 0.872                   | 1.147 |
|       | abdominal pain             | 0.789                   | 1.267 |
|       | backache                   | 0.847                   | 1.180 |
|       | history of pancreatitis    | 0.906                   | 1.104 |
|       | jaundice                   | 0.880                   | 1.136 |
|       | CEA                        | 0.859                   | 1.164 |
|       | CA199                      | 0.860                   | 1.162 |
|       | TBIL                       | 0.559                   | 1.788 |
|       | tumor density              | 0.937                   | 1.068 |
|       | distant metastasis         | 0.826                   | 1.211 |
|       | parenchymal atrophy        | 0.798                   | 1.253 |
|       | pancreatic duct dilatation | 0.671                   | 1.489 |
|       | CBD dilation               | 0.424                   | 2.358 |
|       | duodenal invasion          | 0.719                   | 1.391 |
|       | lymph node metastasis      | 0.840                   | 1.191 |
|       | surgical margin status     | 0.880                   | 1.136 |
|       | perineural invasion        | 0.745                   | 1.342 |
|       | tumor location             | 0.445                   | 2.246 |
|       | operation                  | 0.293                   | 3.407 |

a. Dependent Variable: histological grade

Note: A total of 22 features achieved no multicollinearity with tolerance > 0.1 and VIF < 5.
